# Supplementary material for: Sodium-Glucose Cotransporter-2 Inhibitor for Renal Function Preservation in Patients with Type 2 Diabetes Mellitus: A Korean Diabetes Association and Korean Society of Nephrology Consensus Statement
Source: PubMed Central journal article supplement — Diabetes Metab J. 2020 Aug 21;44(4):489–97. doi: 10.4093/dmj.2020.0172 (PMC7453978; doi:10.4093/dmj.2020.0172), 2020-08-21
Supplement: dmj-44-489-s001.pdf [file dmj-44-489-s001.pdf]

**Supplementary Table 1.** Characteristics of randomized clinical trials included in meta-analysis

| Study                  | Year | Experimental  | Control              | Background anti-diabetic mediations       | Length of treatment | No. of participants |
|------------------------|------|---------------|----------------------|-------------------------------------------|---------------------|---------------------|
| Barnett et al. [22]    | 2014 | Empagliflozin | Placebo              | Naïve                                     | 52 wk               | 290                 |
| Bailey et al. [23]     | 2013 | Dapagliflozin | Placebo              | Metformin                                 | 102 wk              | 546                 |
| Haering et al. [24]    | 2015 | Empagliflozin | Placebo              | Metformin, sulphonylurea                  | 76 wk               | 666                 |
| Kaku et al. [21]       | 2017 | Empagliflozin | Placebo              | Various                                   | Median: 2.6 yr      | 1,517               |
| Kohan et al. [25]      | 2014 | Dapagliflozin | Placebo              | Insulin, sulphonylurea, thiazolidinedione | 104 wk              | 252                 |
| Kovasc et al. [26]     | 2015 | Empagliflozin | Placebo              | Metformin, thiazolidinedione              | 76 wk               | 498                 |
| Merker et al. [27]     | 2015 | Empagliflozin | Placebo              | Metformin                                 | 76 wk               | 637                 |
| Roden et al. [28]      | 2015 | Empagliflozin | Placebo, sitagliptin | Naïve                                     | 76 wk               | 676                 |
| Rosenstock et al. [29] | 2015 | Empagliflozin | Placebo              | Insulin                                   | 78 wk               | 494                 |
| Wanner et al. [10]     | 2016 | Empagliflozin | Placebo              | Various                                   | Median: 2.6 yr      | 7,020               |
| Wilding et al. [30]    | 2014 | Dapagliflozin | Placebo              | Insulin                                   | 104 wk              | 800                 |
| Wiviott et al. [9]     | 2019 | Dapagliflozin | Placebo              | Various                                   | Median: 4.2 yr      | 17,160              |
