# Supplementary material for: Sodium-Glucose Cotransporter-2 Inhibitor for Renal Function Preservation in Patients with Type 2 Diabetes Mellitus: A Korean Diabetes Association and Korean Society of Nephrology Consensus Statement
Source: PubMed Central journal article supplement — Diabetes Metab J. 2020 Aug 21;44(4):489–97. doi: 10.4093/dmj.2020.0172 (PMC7453978; doi:10.4093/dmj.2020.0172), 2020-08-21
Supplement: dmj-44-489-s002.pdf [file dmj-44-489-s002.pdf]

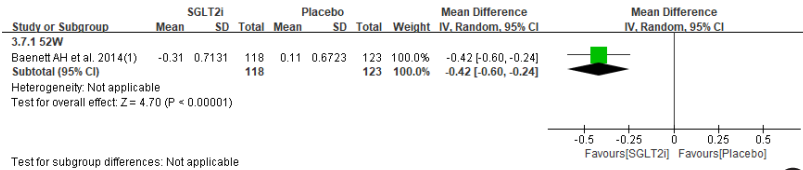

A

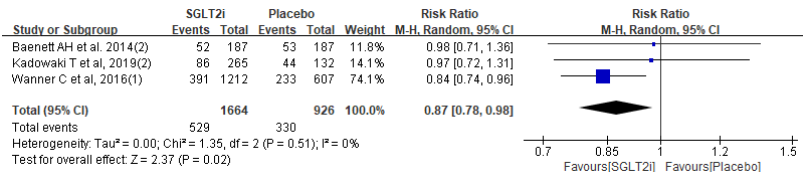

B

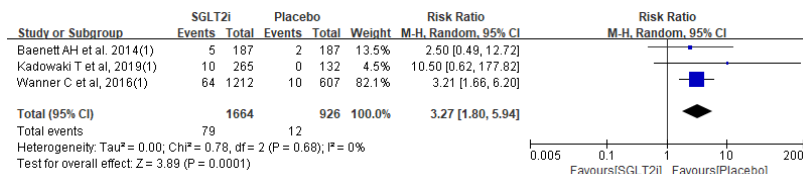

C

**Supplementary Fig. 1.** Results of patients with estimated glomerular filtration rate below 60 mL/min/1.73 m<sup>2</sup>. Effect of sodium-glucose cotransporter-2 (SGLT2) inhibitors on (A) change of glycosylated hemoglobin, (B) hypoglycemia, and (C) genital infection. SD, standard deviation; IV, inverse variance; CI, confidence interval.
