# Supplementary material for: Sodium-Glucose Cotransporter-2 Inhibitor for Renal Function Preservation in Patients with Type 2 Diabetes Mellitus: A Korean Diabetes Association and Korean Society of Nephrology Consensus Statement
Source: PubMed Central journal article supplement — Diabetes Metab J. 2020 Aug 21;44(4):489–97. doi: 10.4093/dmj.2020.0172 (PMC7453978; doi:10.4093/dmj.2020.0172), 2020-08-21
Supplement: dmj-44-489-s003.pdf [file dmj-44-489-s003.pdf]

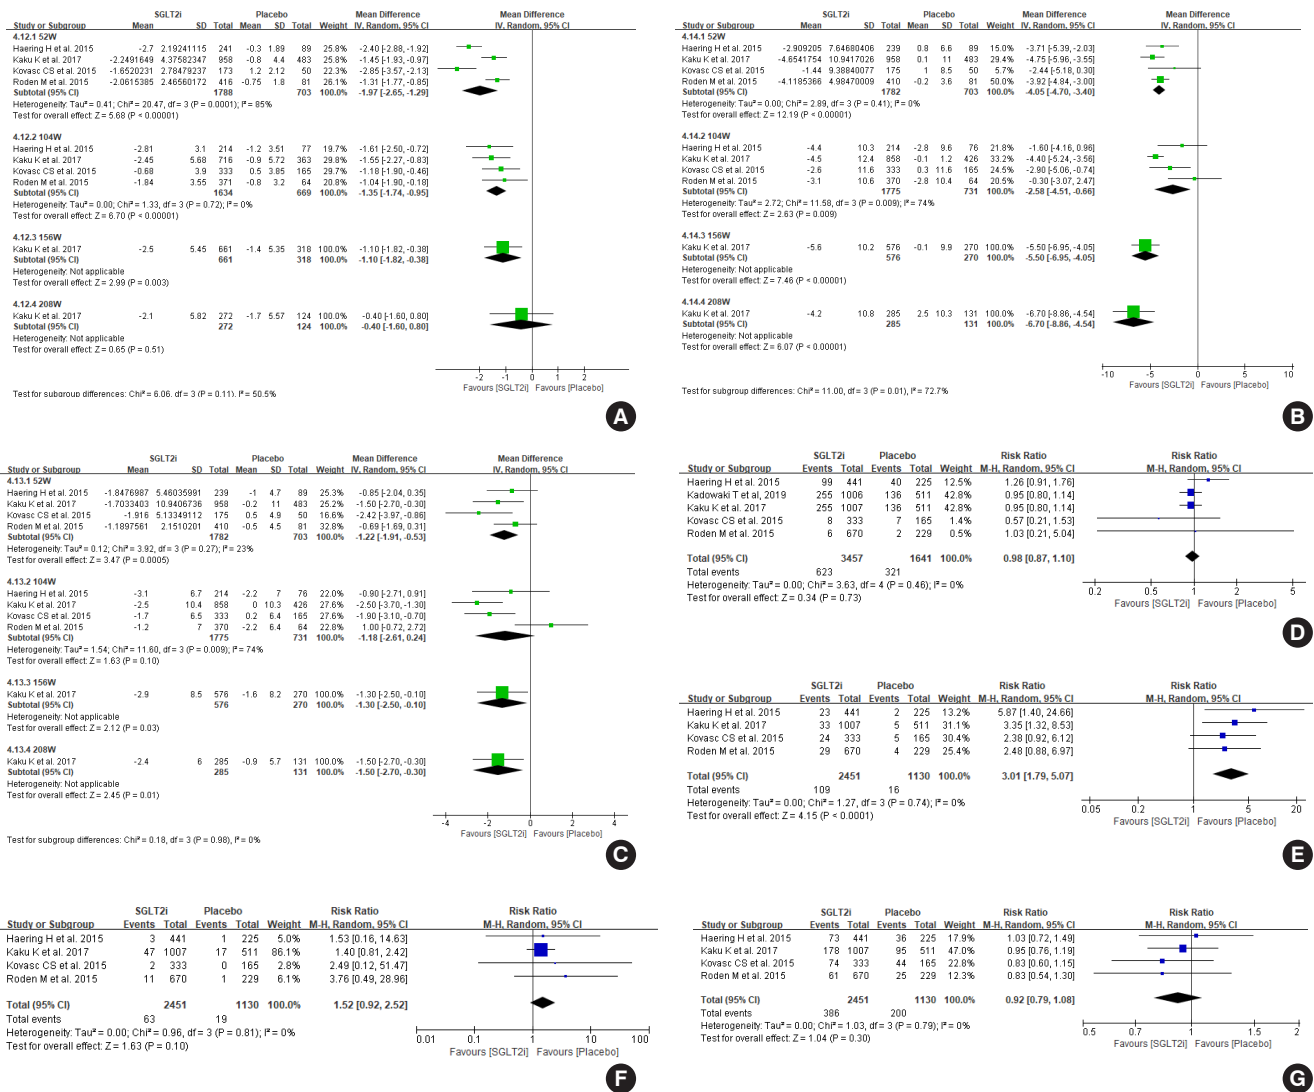

**Supplementary Fig. 2.** Result of Asian dominant studies. Effects of sodium-glucose cotransporter-2 (SGLT2) inhibitors on (A) body weight, (B) systolic blood pressure, (C) diastolic blood pressure, (D) hypoglycemia, (E) genital infection, (F) urinary tract infection, and (G) volume depletion. SD, standard deviation; IV, inverse variance; M-H, Mantel-Haenszel; CI, confidence interval.
