# Supplementary material for: Sodium-Glucose Cotransporter-2 Inhibitor for Renal Function Preservation in Patients with Type 2 Diabetes Mellitus: A Korean Diabetes Association and Korean Society of Nephrology Consensus Statement
Source: PubMed Central journal article supplement — Diabetes Metab J. 2020 Aug 21;44(4):489–97. doi: 10.4093/dmj.2020.0172 (PMC7453978; doi:10.4093/dmj.2020.0172), 2020-08-21
Supplement: dmj-44-489-s004.pdf [file dmj-44-489-s004.pdf]

|                          | bias arising from the randomization process | bias due to deviations from intended interventions | bias in measurement of the outcome | bias due to missing outcome data | bias in selection of the reported result |
|--------------------------|---------------------------------------------|----------------------------------------------------|------------------------------------|----------------------------------|------------------------------------------|
| Baenett AH et al. 2014   | +                                           | +                                                  | +                                  | +                                | +                                        |
| Bailey CJ et al. 2013    | +                                           | +                                                  | +                                  | ?                                | +                                        |
| Haering H et al. 2015    | +                                           | +                                                  | +                                  | +                                | +                                        |
| Kohan DE et al. 2014     | ?                                           | +                                                  | +                                  | ?                                | +                                        |
| Kovasc CS et al. 2015    | +                                           | +                                                  | +                                  | +                                | +                                        |
| Merker L et al. 2015     | +                                           | +                                                  | +                                  | +                                | +                                        |
| Roden M et al. 2015      | +                                           | +                                                  | +                                  | +                                | +                                        |
| Rosenstock J et al. 2015 | +                                           | +                                                  | +                                  | +                                | +                                        |
| Wanner C et al, 2016     | +                                           | +                                                  | +                                  | -                                | +                                        |
| Wilding JP et al, 2014   | +                                           | +                                                  | +                                  | +                                | +                                        |
| Wiviott SD et al, 2019   | +                                           | +                                                  | +                                  | -                                | ?                                        |

Supplementary Fig. 3. Risk of bias assessment.
